# Supplementary material
Source: PubMed Central journal article supplement (PMC5999326)
Supplement: NIHMS946195-supplement-1.pdf [file NIHMS946195-supplement-1.pdf]

## Supplementary Methods S1. Analysis of multimer binding & Immunophenotyping

Dextramer and/or tetramer samples were gated as follows: 1) SSC-A/FSC-A dot plot to set lymphocyte gate; 2) FSC-H/FSC-A dot plot to exclude doublets; 3) FVS510-A/FSC-A dot plot to set viability gate; 4) CD8/FSC-A dot plot to set gate for CD8<sup>high</sup> lymphocytes, excluding NK cells (CD8<sup>low</sup>) and 5) multimer/CD8 dot plot to select dextramer/tetramer<sup>+</sup> CD8<sup>+</sup> lymphocytes.

Immunophenotype panel 1 was gated as follows: FSC-H/FSC-A dot plot to exclude doublets, FVS510-A/FSC-A dot plot to set viability gate, SSC-A/FSC-A dot plot to gate lymphocytes, CD3/FSC-A dot plot to set gate for CD3<sup>+</sup> T cells, CD8/CD4 dot plot to select CD3<sup>+</sup>CD8<sup>+</sup> and CD3<sup>+</sup>CD4<sup>+</sup> T cells. CD3<sup>+</sup>CD8<sup>+</sup> and CD3<sup>+</sup>CD4<sup>+</sup> T cells were individually checked for CD7/CD45RA expression to dissect naïve, effector, central memory and effector memory subsets<sup>7</sup> as well as for their PD-1 levels. Regulatory T cells (Tregs) were defined within the CD3<sup>+</sup>CD4<sup>+</sup> T cells gate according to CD25<sup>hi</sup> CD127<sup>lo</sup> status while the combination of CXC3 and CCR6 guided the distinction between T helper lineages (Supplementary Figure S2).

Similarly, for panel 2 doublets were gated out in a FSC-H/FSC-A dot plot before putting dead cells (FVS<sup>+</sup>) and CD3 T cells into one dump channel. Viable, non-T cells were divided into CD19<sup>+</sup> and CD19<sup>-</sup> subsets with the CD19<sup>+</sup> subset ultimately giving rise to B cells based on simultaneous CD20 expression. The CD3<sup>-</sup>CD19<sup>-</sup> non-T, non-B-cell subset was used to distinguish between HLA-DR<sup>+</sup> and DR<sup>-</sup> myeloid lineages and NK cells: DR<sup>+</sup> cells led to monocytes subsets according to CD14/CD16 expression for classical, intermediate and non-classical monocytes. DR<sup>-</sup> cells on the other hand gave DR<sup>-</sup>CD11b<sup>+</sup>CD14<sup>-</sup>/loCD15<sup>hi</sup> granulocytic MDSCs. Non-T, non-B-cell that were negative for CD20 and CD14 gave rise to CD11c<sup>hi</sup>/DR<sup>hi</sup> myeloid DCs, CD123<sup>hi</sup>/DR<sup>+</sup>/hi plasmacytoid DCs and CD56<sup>+</sup>CD16<sup>+</sup>/- NK cells. Non-T, non-B cells also included CD14<sup>+</sup>CD11b<sup>+</sup>DR<sup>-</sup>/lo monocytic MDSCs (Supplementary Figure S3).

**Supplementary Table S1. Antibodies and dextramers used for flow cytometric analysis**

| ANTIGEN                 | CLONE                | IOSTYPE   | FORMAT          | COMPANY       |
|-------------------------|----------------------|-----------|-----------------|---------------|
| CD4                     | RPA-T4               | mouse IgG | FITC            | BD Pharmingen |
| CD8                     | RPA-T8               | mouse IgG | Alexa Fluor 700 | BD Pharmingen |
| CD25                    | M-A251               | mouse IgG | PE              | BD Pharmingen |
| CD127                   | HIL-7R-M21           | mouse IgG | PE-Cy7          | BD Pharmingen |
| CCR6 (CD196)            | 11A9                 | mouse IgG | BV650           | BD Horizon    |
| CXCR3 (CD183)           | 1C6                  | mouse IgG | PE-CF594        | BD Horizon    |
| CD45RA                  | HI100                | mouse IgG | APC             | BioLegend     |
| CD3e                    | UCHT1                | mouse IgG | PerCP-Cy5.5     | BD Pharmingen |
| CCR7 (CD197)            | 3D12                 | rat IgG   | BV605           | BD Horizon    |
| PD-1                    | EH12.2H7             | mouse IgG | BV421           | BioLegend     |
| CD3e                    | UCHT1                | mouse IgG | BV510           | BD Horizon    |
| HLA-DR                  | G46-6                | mouse IgG | FITC            | BD Pharmingen |
| CD11c                   | B-ly6                | mouse IgG | Alexa Fluor 700 | BD Pharmingen |
| CD20                    | 2H7                  | mouse IgG | APC-H7          | BD Pharmingen |
| CD11b                   | ICRF44               | mouse IgG | PerCP-Cy5.5     | BioLegend     |
| CD14                    | MqP9                 | mouse IgG | PE              | BD Pharmingen |
| CD16                    | 3G8                  | mouse IgG | BV650           | BD Horizon    |
| CD15                    | HI98                 | mouse IgG | APC             | BD Pharmingen |
| CD19                    | HIB19                | mouse IgG | PE-Cy7          | BD Pharmingen |
| CD56                    | B159                 | mouse IgG | PE-CF594        | BD Horizon    |
| CD123                   | 7G3                  | mouse IgG | BV421           | BD Horizon    |
| CD8                     | RPA-T8               | mouse IgG | PerCP-Cy5.5     | BD Pharmingen |
| HLA-A2                  | BB7.2                | mouse IgG | BB515           | BD Horizon    |
| Fixable Viability Stain | N/A                  | N/A       | 510             | BD Horizon    |
| Survivin dextramer      | HLA-A*0201/LMLGEFLKL | N/A       | PE              | Immudex       |
| JARID1B dextramer       | HLA-A*0201/QLYALPCVL | N/A       | FITC            | Immudex       |
| Mucin dextramer         | HLA-A*0201/STAPPVHNV | N/A       | PE              | Immudex       |
| Her2 dextramer          | HLA-A*0201/KIFGSLAFL | N/A       | APC             | Immudex       |

**Supplementary Table S2. Patients with one or more treatment positively-related (maximum grade possible, probable, definite) AEs by treatment arm**

| AE grade | Arm 1 (1 mg/kg,<br>n=11) | Arm 2 (10 mg/kg,<br>n=12) | Total (n=23) |
|----------|--------------------------|---------------------------|--------------|
|          | No. (%)                  | No. (%)                   | No. (%)      |
| <3       | 6 (54.5)                 | 10 (83.3)                 | 16 (69.6)    |
| 3        | 4 (36.4)                 | 1 (8.3)                   | 5 (21.7)     |
| 4        | 1 (9.1)                  | 1 (8.3)                   | 2 (8.7)      |
| 5        | 0 (0)                    | 0 (0)                     | 0 (0)        |

**Supplementary Table S3. Levels of circulating tumor-specific CD8<sup>+</sup> T cells with reactivity for JARID1B, Muc1 or Her2 in breast cancer patients with HLA-A\*0201 status<sup>a</sup>.**

| patient / week | JARID1B T cells |       |       |       | Muc1 T cells |       |       |       | Her2 T cells |       |       |       |
|----------------|-----------------|-------|-------|-------|--------------|-------|-------|-------|--------------|-------|-------|-------|
|                | 0               | 2     | 5     | 15    | 0            | 2     | 5     | 15    | 0            | 2     | 5     | 15    |
| <b>N05</b>     |                 | 0.049 |       |       |              | 0.123 |       |       |              | 0.000 |       |       |
| <b>N10</b>     | 0.768           | 0.201 | 0.407 |       | 0.177        | 0.089 | 0.104 |       | 0.124        | 0.112 | 0.088 |       |
| <b>N14</b>     | 0.235           | 0.271 | 0.207 |       | 0.197        | 0.398 | 0.162 |       | 0.072        | 0.134 | 0.094 |       |
| <b>N15</b>     | 0.160           |       |       | 0.623 | 0.077        |       |       | 0.085 | 0.106        |       |       | 0.058 |
| <b>U03</b>     | 0.255           | 0.681 | 0.068 |       | 0.119        | 0.085 | 0.072 |       | 0.119        | 0.085 | 0.070 |       |
| <b>U07</b>     | 0.085           | 0.096 | 0.137 | 0.057 | 0.060        | 0.108 | 0.089 | 0.039 | 0.196        | 0.184 | 0.168 | 0.083 |

<sup>a</sup>Cells were stained with dextramers presenting the JARID1B (QLYALPCVL), Mucin-1 (STAPPVHNV) and Her2/neu (KIFGSLAFL) peptides and co-stained for CD8<sup>+</sup>. Non-viable cells were excluded on grounds of high fixable viability stain up-take and the remaining sample was subjected to quality control requiring  $\geq 10,000$  viable events and  $\geq 2,000$  CD8<sup>+</sup> T cells. Data are CD8<sup>+</sup> T cells staining positive with the dextramer for each peptide [%]. Six healthy volunteer served as background control (LLD = median + IQR of % dextramer-reactive CD8<sup>+</sup> T cells in the healthy donors).

**Supplementary Table S4. Humoral immune responses were not significantly affected following TGF $\beta$  blockade and radiation<sup>a</sup>.**

| Patient ID | Fmab        | week 0    | week 5    | week 15   |
|------------|-------------|-----------|-----------|-----------|
| <b>N06</b> | <b>10mg</b> | <b>27</b> | <b>21</b> | <b>24</b> |
| N09        | 1mg         | 25        | 5         |           |
| <b>U02</b> | <b>10mg</b> | <b>17</b> | <b>18</b> |           |
| N03        | 1mg         | 7         | 3         | 1         |
| <b>U03</b> | <b>10mg</b> | <b>1</b>  | <b>3</b>  | <b>17</b> |
| <b>N11</b> | <b>10mg</b> | <b>0</b>  | <b>0</b>  | <b>6</b>  |
| <b>N04</b> | <b>10mg</b> | <b>2</b>  | <b>0</b>  |           |
| <b>U07</b> | <b>10mg</b> | <b>1</b>  | <b>1</b>  | <b>1</b>  |
| N05        | 1mg         | 1         | 0         |           |
| N13        | 1mg         | 1         | 2         |           |
| U04        | 1mg         | 0         | 0         | 1         |
| <b>U05</b> | <b>10mg</b> | <b>0</b>  | <b>0</b>  | <b>3</b>  |
| N01        | 1mg         | 0         | 0         |           |
| <b>N02</b> | <b>10mg</b> | <b>0</b>  | <b>0</b>  | <b>1</b>  |
| N10        | 1mg         | 0         | 0         |           |

<sup>a</sup>Serum samples from 15 patients were tested for antibody reactivity against 34 different putative tumor-antigens by Seramatrix Corp. (Carlsbad, CA). A positive score was returned for any titer that was above 2x the 25<sup>th</sup> percentile of all antibodies, patients and time points. Data are cumulative positive titers in each patient.

## Supplementary Figure S1: Study schema

Eligible patients after informed consent: Baseline CT and PET scan, Definition of target and non-target lesions:

**Non-target** lesion is treated by radiation while **Target** lesions are followed to assess possible abscopal effect

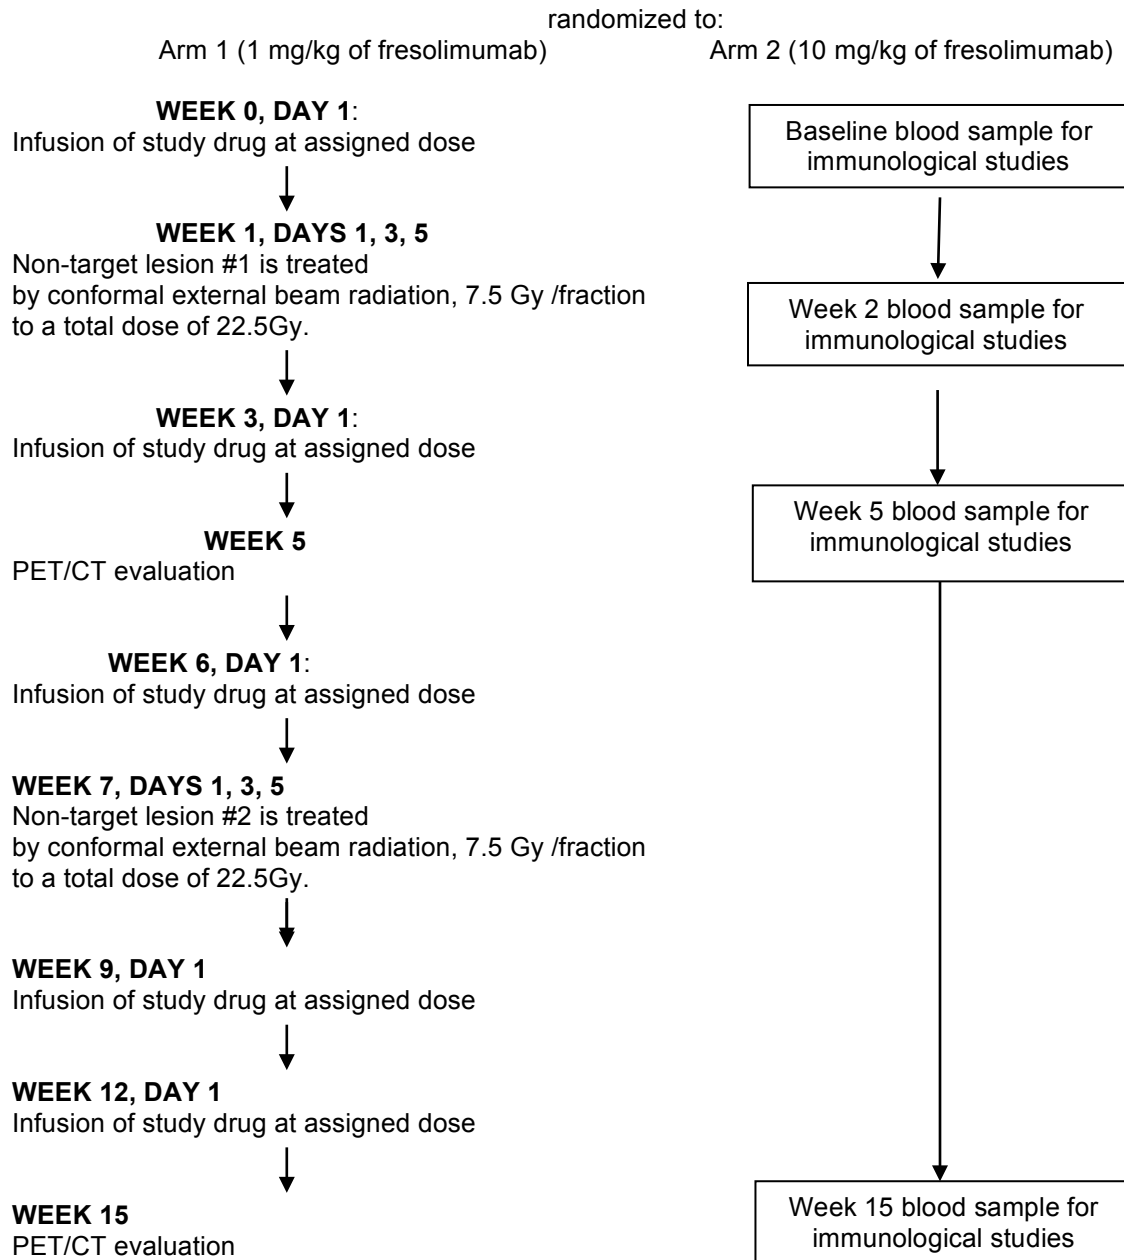

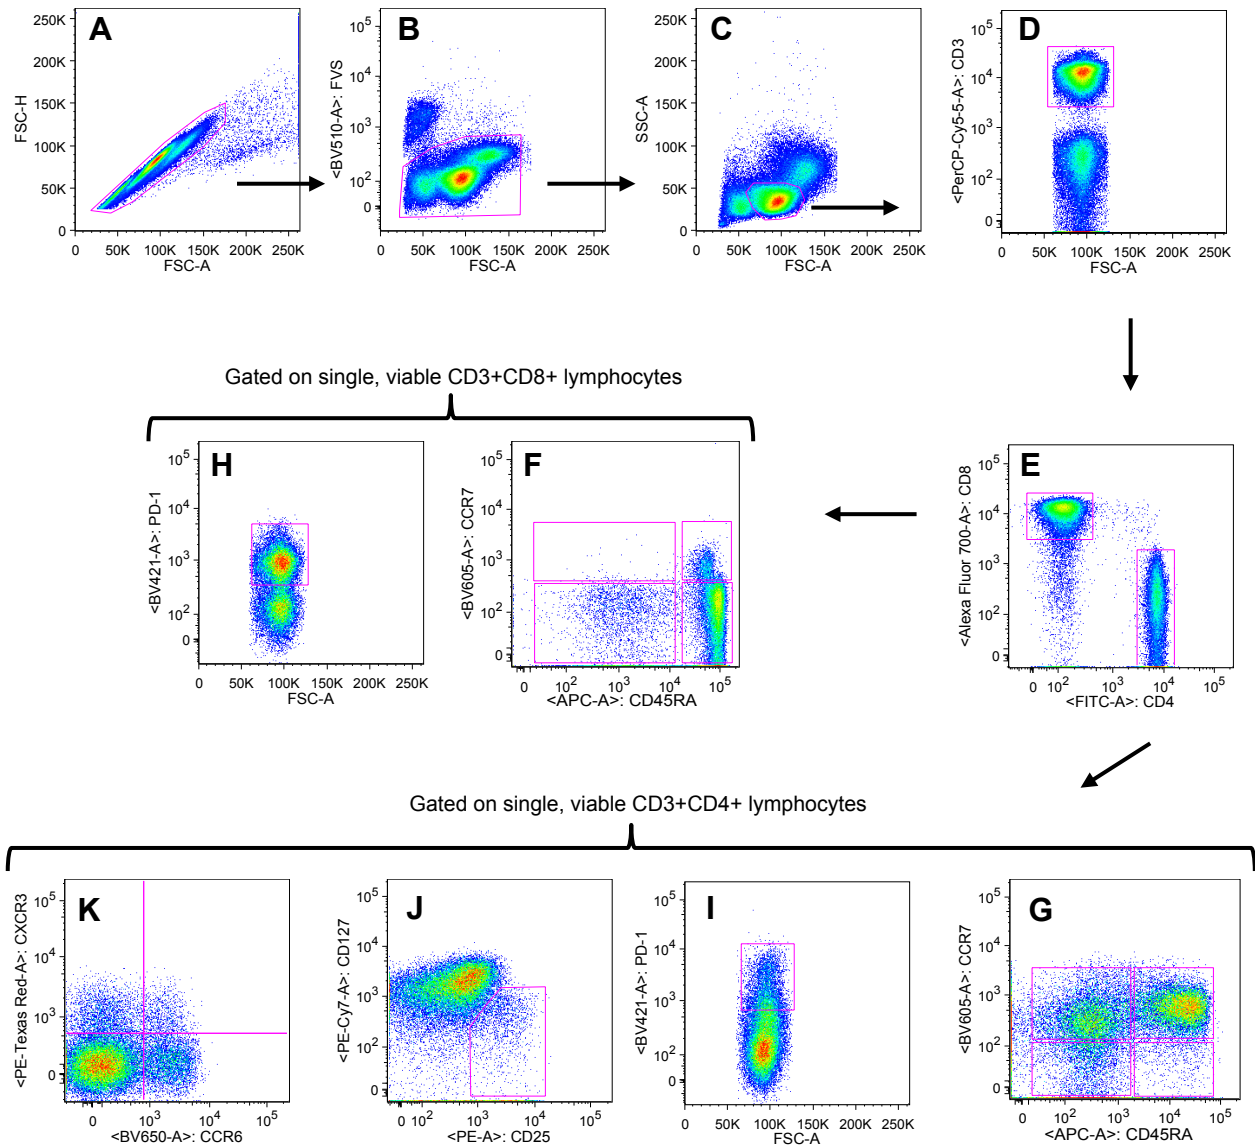

**Supplementary Figure S2. Gating strategy in panel 1.** **A)** FSC-H/FSC-A dot plot to exclude doublets; **B)** FVS510-A/FSC-A dot plot to set viability gate; **C)** SSC-A/FSC-A dot plot to gate in lymphocyte; **D)** CD3/FSC-A dot plot to set gate for CD3+ T cells; **E)** CD8/CD4 dot plot to select CD3+CD8+ and CD3+CD4+ T cells, which were individually checked for CCR7/CD45RA expression to dissect naïve, effector, central memory and effector memory subsets (**F** and **G**) as well as for their PD-1 levels (**H** and **I**); **J)** Regulatory T cells (Tregs) were defined within the CD3+CD4+ T cells gate according to CD25<sup>hi</sup> CD127<sup>lo</sup> status while the combination of CXCR3 and CCR6 guided the distinction between T helper lineages (**K**).

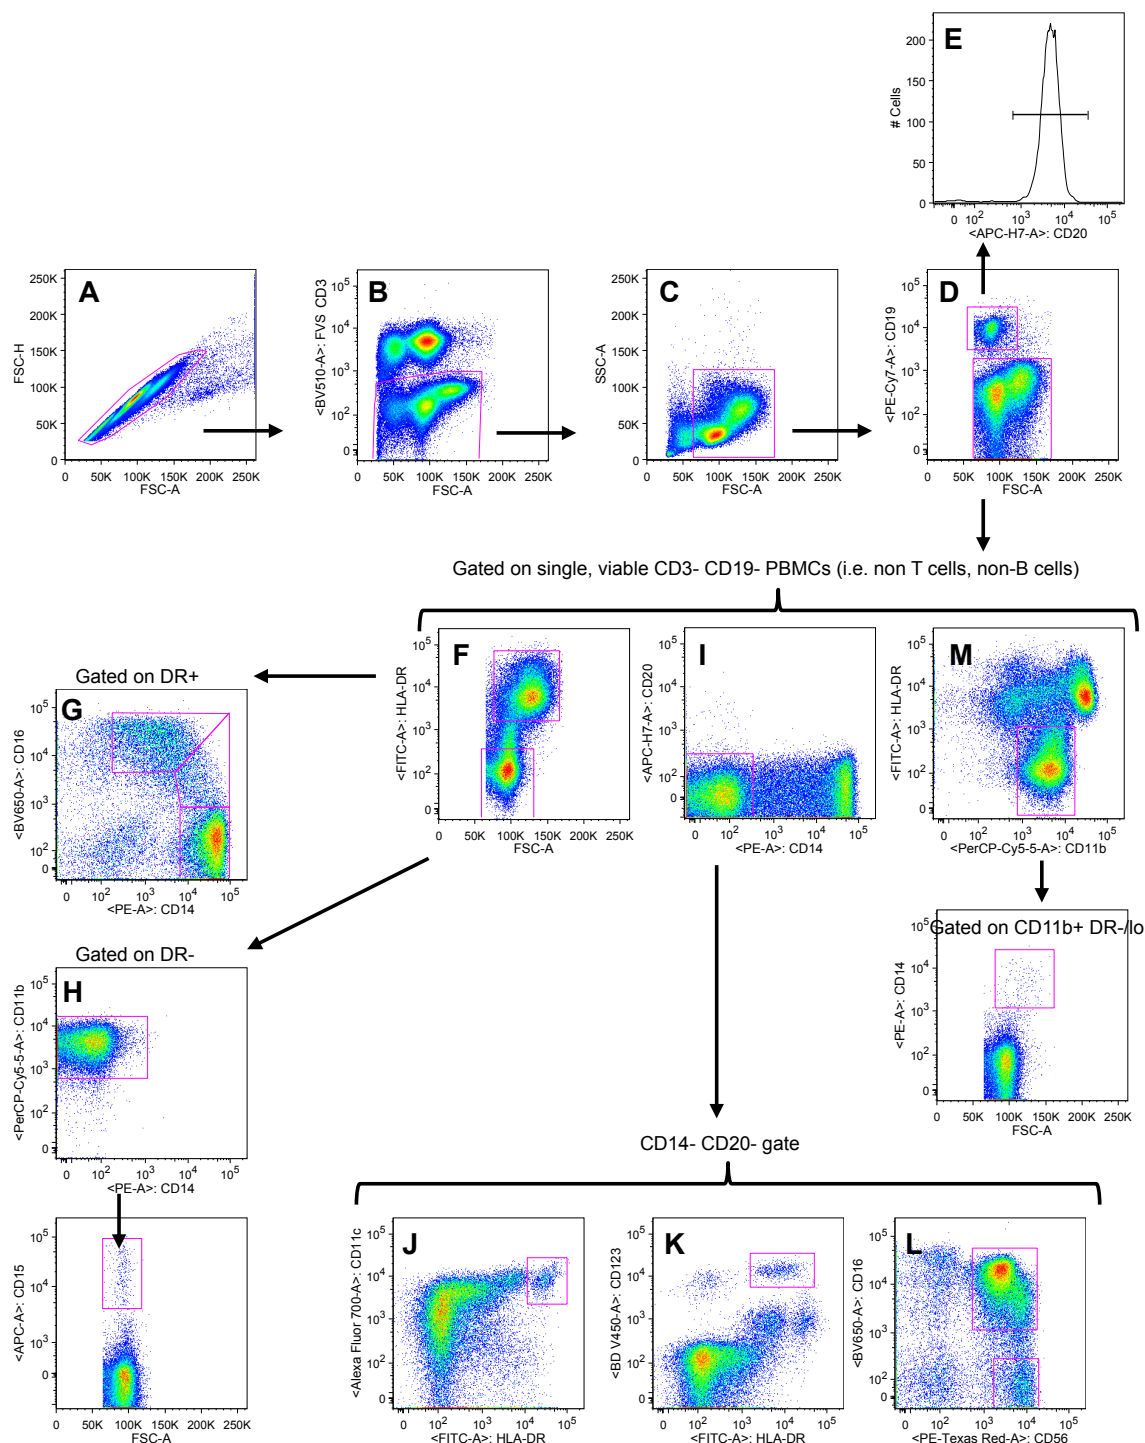

**Supplementary Figure S3. Gating strategy in panel 2.** A) FSC-H/FSC-A dot plot, gating out doublets; B) 510-A/FSC-A dot plot to exclude CD3+ lymphocytes and dead cells; C) viable non-T cells; D) CD19/FSC-A dot plot to select live CD3-CD19- and live CD3-CD19+ cells with the CD19+ subset ultimately enumerating B cells based on simultaneous CD20 expression (E); F) The CD19-subset was used to distinguish between HLA-DR+ and DR- myeloid lineages; G) DR+ cells led to monocytes subsets according to CD14/CD16 expression for classical, intermediate and non-classical monocytes; H) DR- cells on the other hand led to DR-CD11b+CD14-/loCD15hi granulocytic myeloid-derived suppressor cells (gMDSC); I) CD3-CD19-CD20-CD14- give rise to J) CD11chi/DRhi myeloid dendritic cells (DCs), K) CD123hi/DR+/hi plasmacytoid DCs and L) CD56+CD16+/- NK cells; M) non-T, non-B cells also include CD14+CD11b+DR-/lo monocytic myeloid-derived suppressor cells (mMDSC).

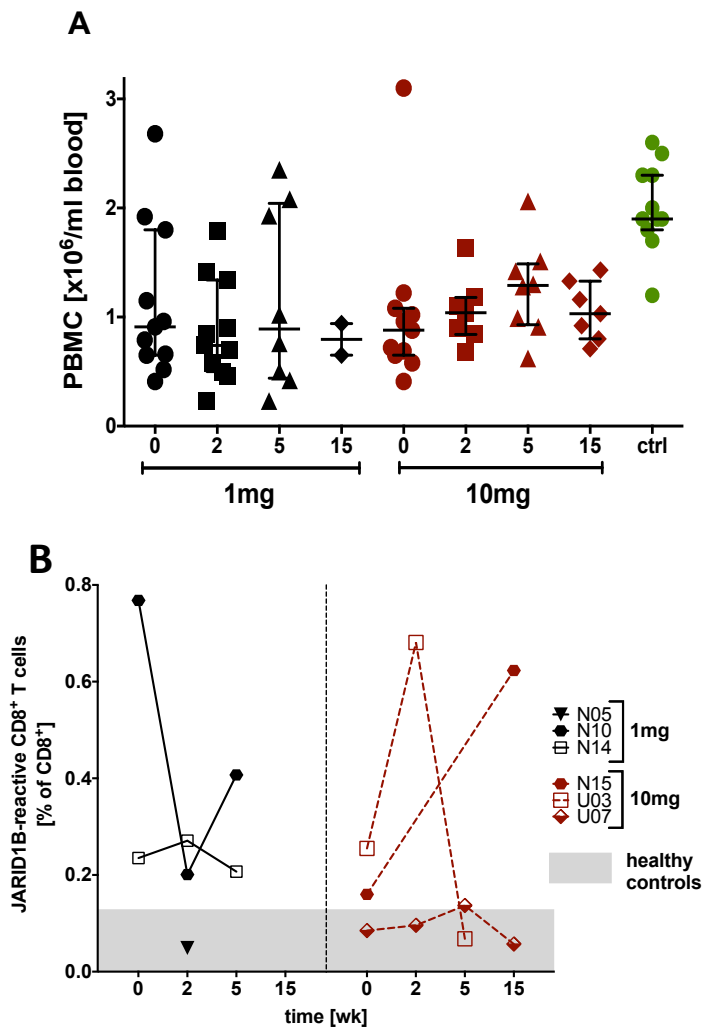

**Supplementary Figure S4. Changes in PBMC, survivin- and JARID1B-reactive CD8 T cells in response to TGF $\beta$  blockade and radiation. (A)** Absolute levels of PBMCs were maintained or rose in patients receiving fresolimumab, especially 10mg/kg. Green values are for healthy donors **(B)** Dextramer binding data are shown as % JARID-positive CD8<sup>+</sup> T cells over the course of a 15 week treatment. The presumed threshold of median + IQR of n=11 healthy control levels is indicated in gray. (N=NYU patient; U=UCLA patient; black=1mg and red=10mg fresolimumab, green=11 healthy donors, N01 and N01\* indicates a repeated draws at week 0 and week 2 due to significant treatment delay).

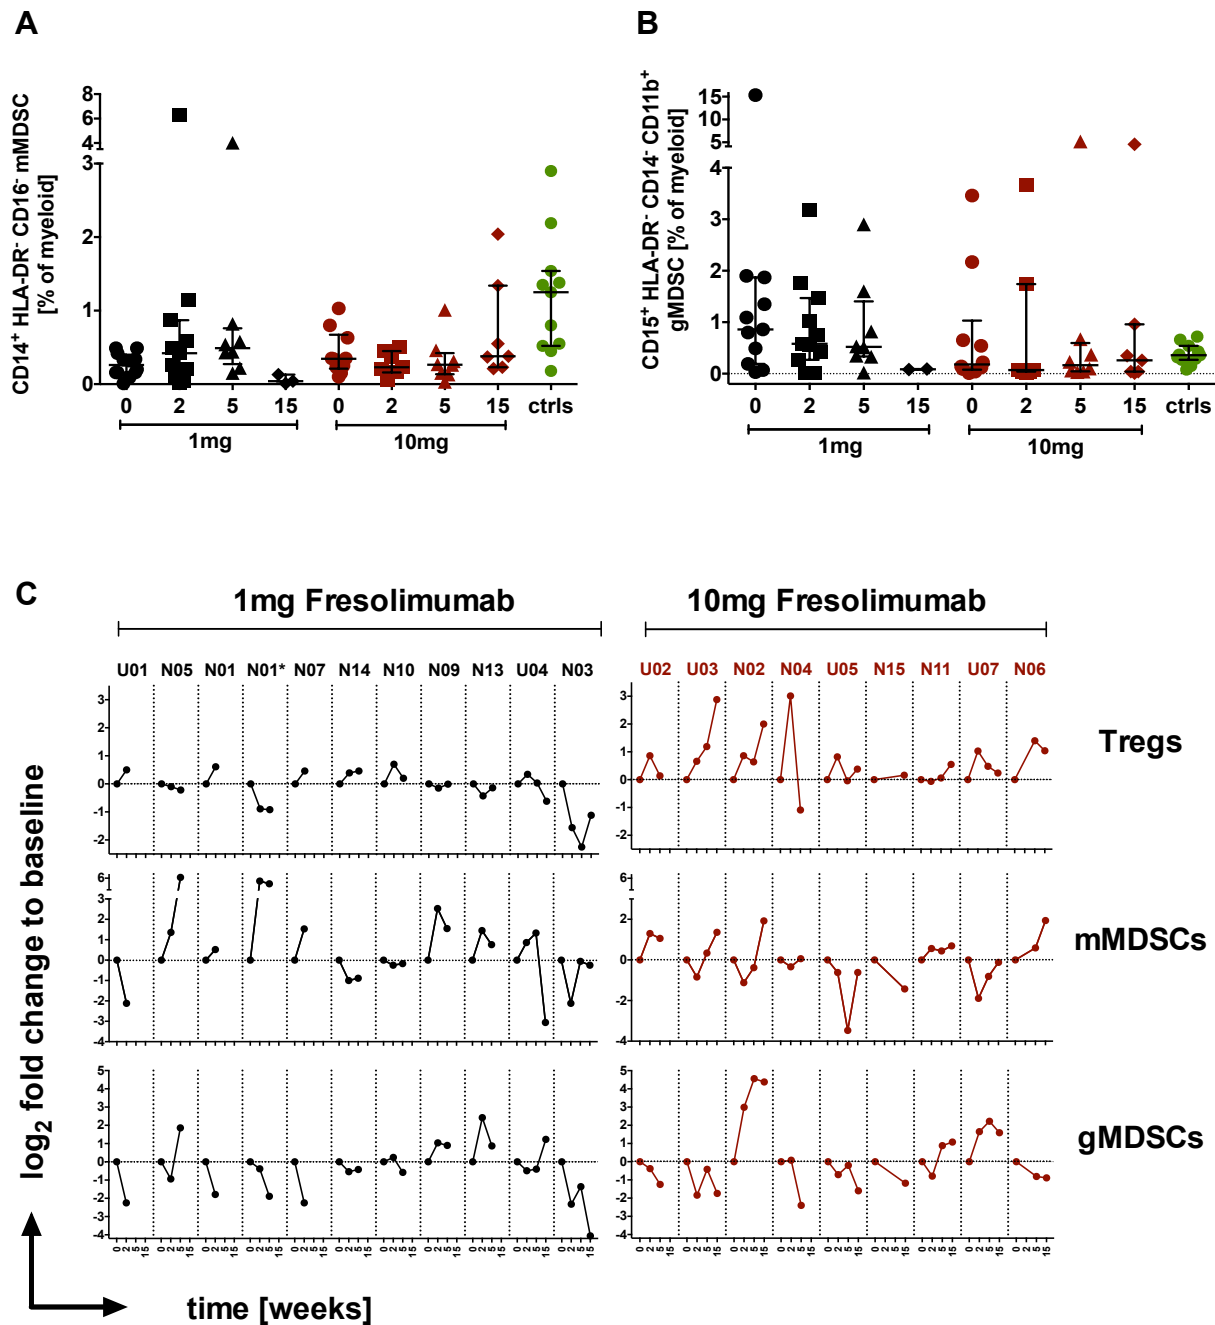

**Supplementary Figure S5. Diametrically opposing dynamics in the myeloid suppressor compartment versus the suppressor T cell pool in response to TGF $\beta$  blockade and radiation. A) Myeloid cells with the monocytic (CD14+DR-CD16-) or B) the granulocytic (CD15+DR-CD14-CD11b+) myeloid-derived suppressor cell profile are shown as individual points. C) Changes in myeloid suppression is often diametrically opposed to those in Treg. Patients were ranked according to survival from shortest (left) to longest (right) within each treatment arm. (N=treated at NYU; U=treated at UCLA; black=1mg and red=10mg Fresolimumab, green=11 healthy volunteers)**

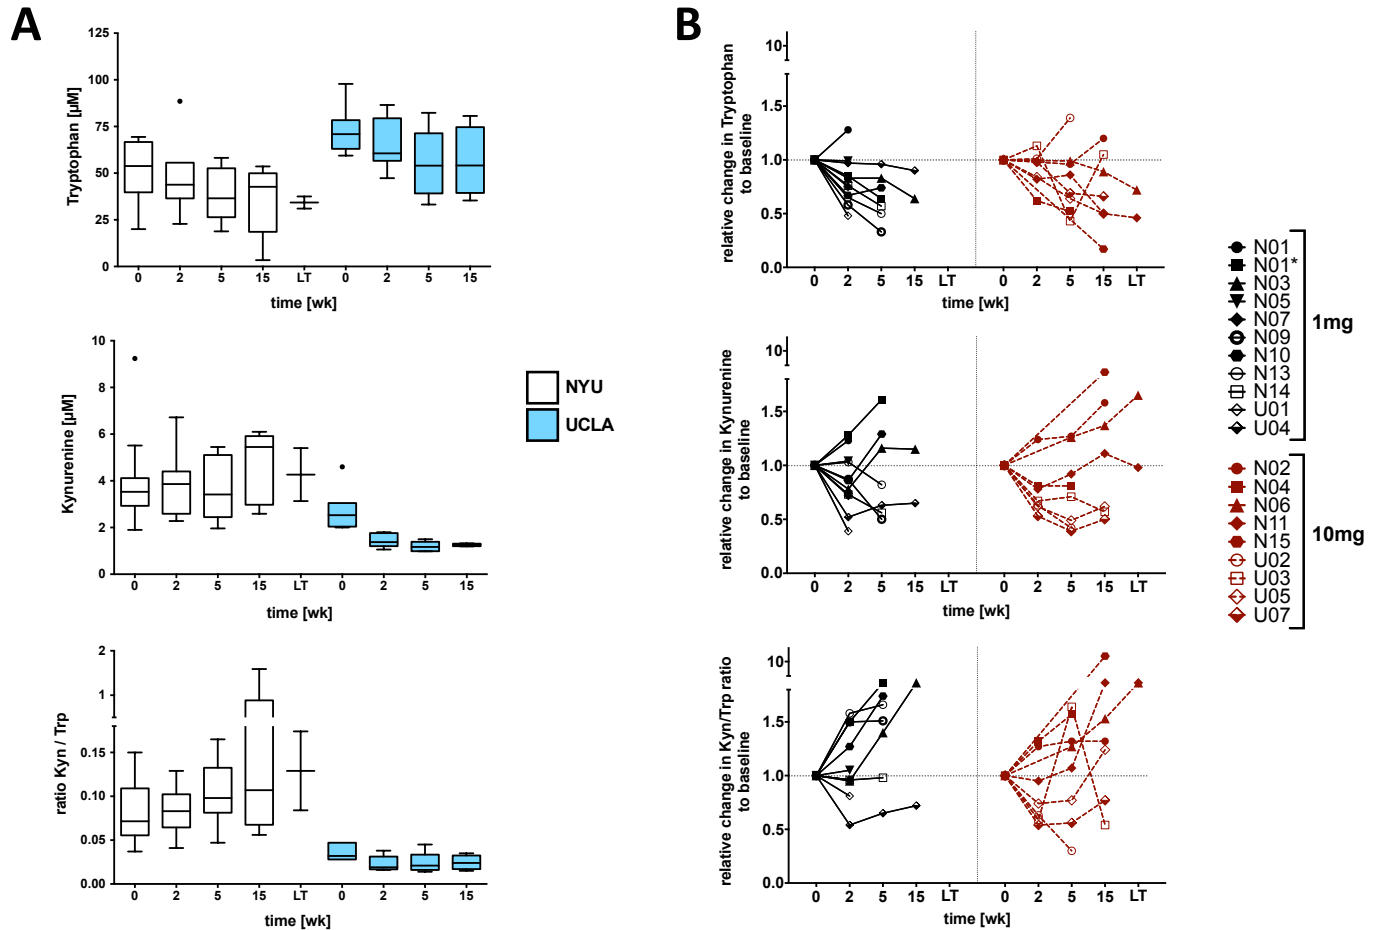

**Supplementary Figure S6. Changes in plasma levels of tryptophan and kynurenine in response to TGF $\beta$  blockade and radiation.** Patient's plasma samples were analyzed in two batches according to treatment location (NYU vs UCLA) by liquid chromatographic/tandem mass spectrometry. **A)** Median and IQR (Tukey graph; whiskers 1.5xIQR) for each batch (NYU=white, UCLA=blue). **B)** log2 fold change to baseline for each patient over time (N=treated at NYU; U=treated at UCLA; black=1mg and red=10mg fresolimumab).
